# Supplementary material
Source: PubMed Central journal article supplement (PMC8915409)
Supplement: NIHMS1770005-supplement-1.pdf [file NIHMS1770005-supplement-1.pdf]

Supplemental Table 1

**Supplemental Table 1. Differences in sample characteristics and RAQ responses between those who were interested in research and those who were not.**

|                 | <b>Interested</b> |           | <b>Not Interested</b> |           |         |
|-----------------|-------------------|-----------|-----------------------|-----------|---------|
|                 | N=72              |           | N=25                  |           |         |
| <b>Variable</b> | Mean              | Std. Dev. | Mean                  | Std. Dev. | p-value |
| <b>Age</b>      | 75.4              | 8.5       | 74.0                  | 9.0       | 0.426   |

|                                      |       |      |       |      |        |
|--------------------------------------|-------|------|-------|------|--------|
| <b>Male</b>                          | 18.6% |      | 16.7% |      | 0.834  |
| <b>Country of Origin (%)</b>         |       |      |       |      | 0.643  |
| <b>Puerto Rico</b>                   | 45.83 |      | 48.45 |      |        |
| <b>Dominican Republic</b>            | 19.44 |      | 18.56 |      |        |
| <b>U.S.</b>                          | 12.5  |      | 13.4  |      |        |
| <b>Other</b>                         | 22.22 |      | 19.59 |      |        |
| <b>Education</b>                     | 11.10 | 3.82 | 9.96  | 3.96 | 0.2145 |
| <b>Bilingual or English-speaking</b> | 29.2% |      | 24.0% |      | 0.619  |
| <b>Primary language Spanish</b>      | 70.8% |      | 76.0% |      |        |
| <b>Q1</b>                            | 4.35  | 0.73 | 3.88  | 1.05 | 0.0298 |
| <b>Q2</b>                            | 4.17  | 0.79 | 3.28  | 1.28 | 0.0015 |
| <b>Q3</b>                            | 4.19  | 0.80 | 3.48  | 1.36 | 0.0221 |
| <b>Q4</b>                            | 4.35  | 0.82 | 3.96  | 1.31 | 0.3019 |
| <b>Q5</b>                            | 4.10  | 0.84 | 3.48  | 1.19 | 0.0168 |
| <b>Q6</b>                            | 4.28  | 0.81 | 3.84  | 0.94 | 0.0235 |
| <b>Q7</b>                            | 4.07  | 0.94 | 4.00  | 0.82 | 0.4973 |
| <b>RAQ Total Score</b>               | 29.50 | 4.58 | 25.92 | 6.09 | 0.0069 |

SUPPLEMENTAL TABLE 2: Cronbach's alpha as a measure of internal consistency of the RAQ by Cohort and language.

|                      | Cohort 1 | Cohort 2 | Both Cohorts |
|----------------------|----------|----------|--------------|
| English or bilingual | 0.8929   | 0.8834   | 0.9018       |
| Spanish              | 0.9267   | 0.8955   | 0.9139       |
| All languages        | 0.9202   | 0.8942   | 0.9111       |
